# Supplementary material for: Hydrodynamic repulsion of spheroidal microparticles from micro-rough surfaces
Source: PubMed Central journal article supplement (PMC5555679; doi:10.1371/journal.pone.0183093), 2017-08-14

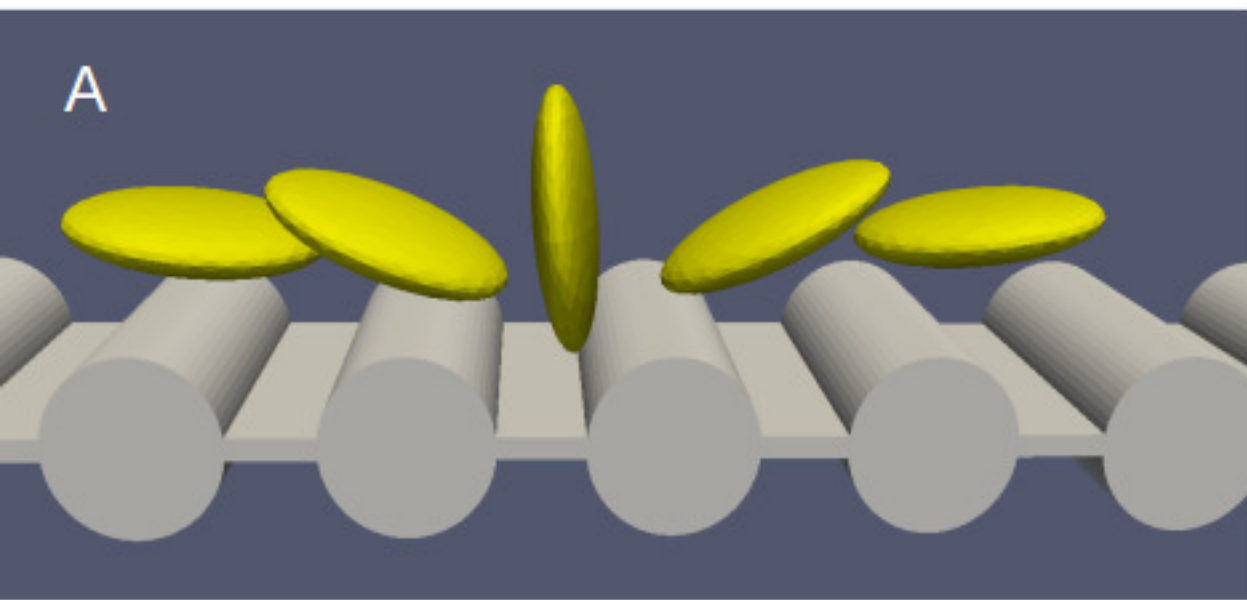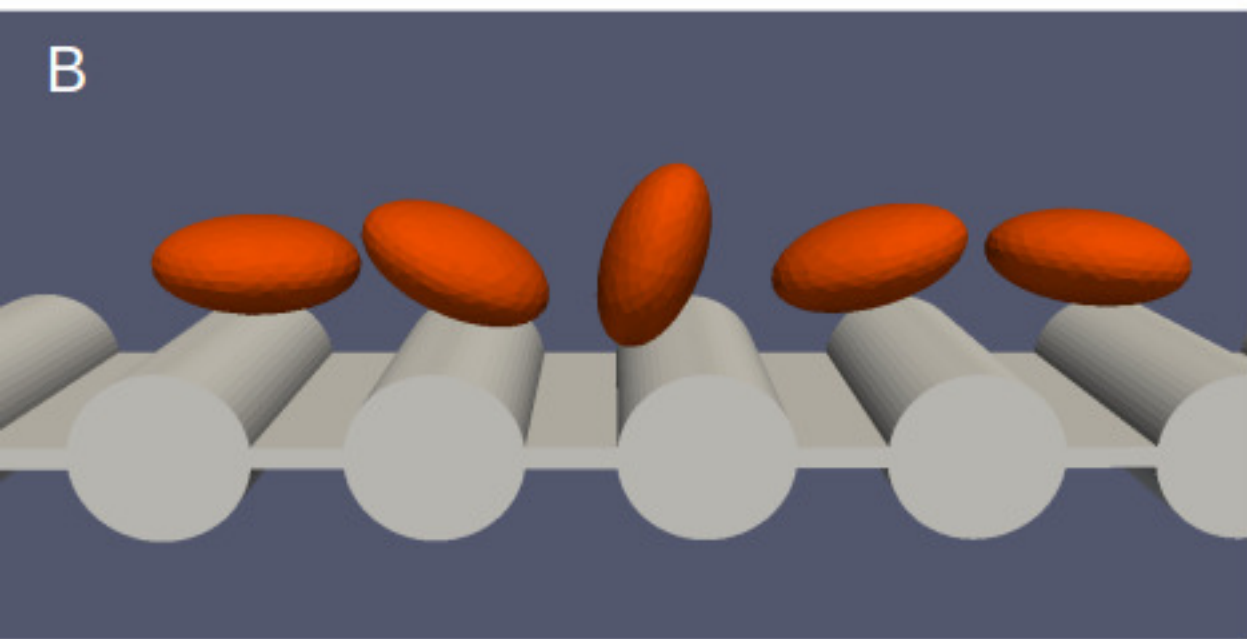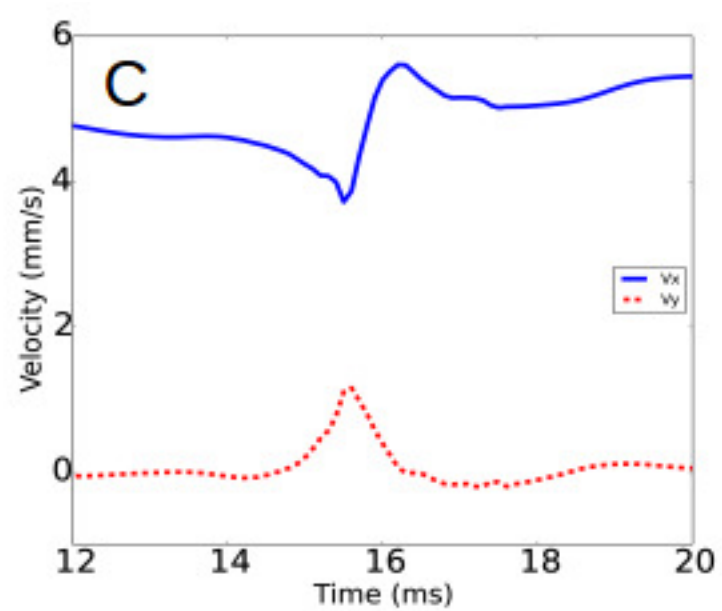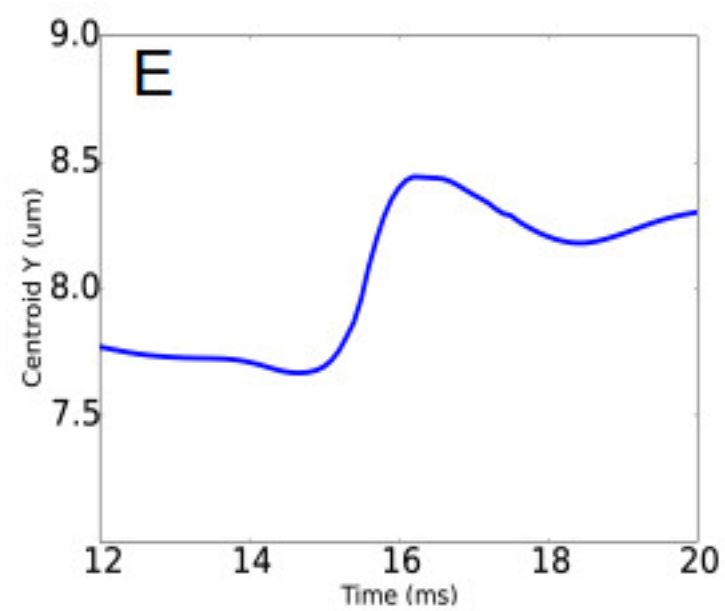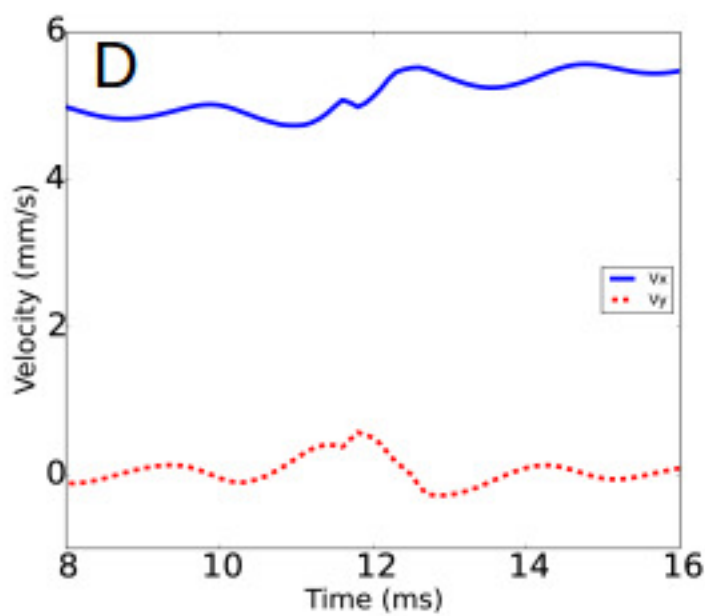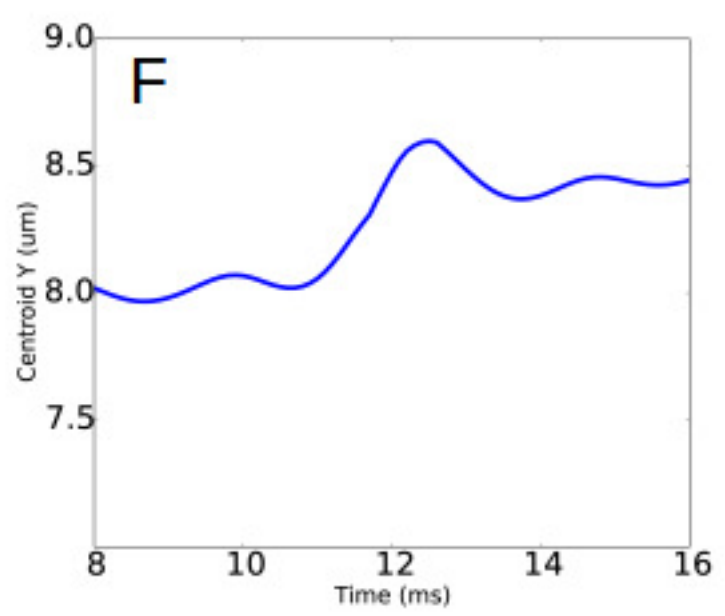

Supplement: pone.0183093.s003.pdf [file pone.0183093.s003.pdf]
